# Supplementary material for: Association of a dysbiotic oral microbiota with the development of focal lymphocytic sialadenitis in IκB-ζ-deficient mice
Source: PubMed Central journal article supplement (PMC7599236; doi:10.1038/s41522-020-00158-4), 2020-10-30
Supplement: 41522_2020_158_MOESM1_ESM.pdf [file 41522_2020_158_MOESM1_ESM.pdf]

**Supplementary Table 1. Mice and cage ID used in the study**

| Age                 | Mouse ID                     | Genotype                     | Cage ID <sup>a</sup> | Housing Condition |  |
|---------------------|------------------------------|------------------------------|----------------------|-------------------|--|
| week 24             | M-19                         | <i>Nfkbiz</i> <sup>-/-</sup> | 1                    | non-cohoused      |  |
|                     | M-25                         | <i>Nfkbiz</i> <sup>-/-</sup> | 2                    | non-cohoused      |  |
|                     | M-0                          | <i>Nfkbiz</i> <sup>+/+</sup> | 3                    | non-cohoused      |  |
|                     | M-45                         |                              |                      |                   |  |
|                     | M-49                         |                              |                      |                   |  |
|                     | M-50                         |                              |                      |                   |  |
|                     | M-51                         |                              |                      |                   |  |
|                     | M-82                         | <i>Nfkbiz</i> <sup>-/-</sup> | 4                    | non-cohoused      |  |
|                     | M-183                        | <i>Nfkbiz</i> <sup>-/-</sup> | 5                    | non-cohoused      |  |
|                     | M-188                        |                              |                      |                   |  |
| week 3<br>& week 20 | M40                          | <i>Nfkbiz</i> <sup>-/-</sup> | 6                    | cohoused          |  |
|                     | M28                          | <i>Nfkbiz</i> <sup>+/+</sup> |                      |                   |  |
|                     | M29                          |                              |                      |                   |  |
|                     | M31                          | <i>Nfkbiz</i> <sup>+/+</sup> | 7                    | non-cohoused      |  |
|                     | M32                          |                              |                      |                   |  |
|                     | M47                          | <i>Nfkbiz</i> <sup>-/-</sup> | 8                    | non-cohoused      |  |
|                     | M48                          |                              |                      |                   |  |
|                     | M49                          |                              |                      |                   |  |
|                     | M53                          | <i>Nfkbiz</i> <sup>-/-</sup> | 9                    | cohoused          |  |
|                     | M57                          | <i>Nfkbiz</i> <sup>+/+</sup> |                      |                   |  |
|                     | M55                          | <i>Nfkbiz</i> <sup>+/+</sup> | 10                   | non-cohoused      |  |
|                     | M56                          |                              |                      |                   |  |
|                     | M58                          |                              |                      |                   |  |
|                     | M59                          |                              |                      |                   |  |
|                     | M74                          | <i>Nfkbiz</i> <sup>-/-</sup> | 11                   | cohoused          |  |
|                     | M76                          |                              |                      |                   |  |
|                     | M79                          | <i>Nfkbiz</i> <sup>+/+</sup> |                      |                   |  |
|                     | M82                          | <i>Nfkbiz</i> <sup>-/-</sup> | 12                   | cohoused          |  |
|                     | M83                          | <i>Nfkbiz</i> <sup>+/+</sup> |                      |                   |  |
|                     | M88                          | <i>Nfkbiz</i> <sup>-/-</sup> | 13                   | non-cohoused      |  |
| M89                 |                              |                              |                      |                   |  |
| M207                | <i>Nfkbiz</i> <sup>+/+</sup> | 14                           | cohoused             |                   |  |
| M213                | <i>Nfkbiz</i> <sup>-/-</sup> |                              |                      |                   |  |
| M231                | <i>Nfkbiz</i> <sup>-/-</sup> | 15                           | non-cohoused         |                   |  |

<sup>a</sup>The cage ID is in a chronological order based on the date of birth.

**Supplementary Table 2. Differentially expressed genes in the salivary glands of *Nfkbiz*<sup>-/-</sup> vs. *Nfkbiz*<sup>+/+</sup> mice.**

| Gene_Symbol    | Description                                                           | KO/WT<br>fold change | KO/WT<br>volume | <i>p</i> | <i>q</i> |
|----------------|-----------------------------------------------------------------------|----------------------|-----------------|----------|----------|
| <i>Jchain</i>  | immunoglobulin joining chain                                          | 7.36                 | 4.74            | 0.017    | 0.957    |
| <i>Oas1a</i>   | 2-5 oligoadenylate synthetase 1A                                      | 3.79                 | 4.12            | 0.003    | 0.957    |
| <i>Usp18</i>   | ubiquitin specific peptidase 18                                       | 3.19                 | 6.02            | 0.045    | 0.957    |
| <i>Spi1</i>    | spleen focus forming virus<br>(SFFV) proviral integration<br>oncogene | 2.82                 | 6.24            | 0.029    | 0.957    |
| <i>Znfx1</i>   | zinc finger, NFX1-type<br>containing 1                                | 2.75                 | 5.88            | 0.023    | 0.957    |
| <i>Lgals9</i>  | lectin, galactose binding, soluble<br>9                               | 2.55                 | 5.52            | 0.021    | 0.957    |
| <i>Baiap2</i>  | brain-specific angiogenesis<br>inhibitor 1-associated protein 2       | 2.37                 | 5.60            | 0.011    | 0.957    |
| <i>Eif2ak2</i> | eukaryotic translation initiation<br>factor 2-alpha kinase 2          | 2.34                 | 6.90            | 0.006    | 0.957    |
| <i>Xaf1</i>    | XIAP associated factor 1                                              | 2.25                 | 4.95            | 0.044    | 0.957    |
| <i>Insc</i>    | Inscuteable homolog                                                   | 2.23                 | 3.43            | 0.011    | 0.957    |
| <i>Sdc3</i>    | syndecan 3                                                            | 2.23                 | 5.46            | 0.037    | 0.957    |
| <i>H2-Q7</i>   | histocompatibility 2, Q region<br>locus 7                             | 2.20                 | 7.63            | 0.046    | 0.957    |
| <i>Fnl1</i>    | fibronectin 1                                                         | 2.15                 | 5.69            | 0.007    | 0.957    |
| <i>Elk4</i>    | ELK4, member of ETS oncogene<br>family                                | 2.15                 | 7.00            | 0.007    | 0.957    |
| <i>Apbb2</i>   | amyloid beta (A4) precursor<br>protein-binding, family B,<br>member 2 | 2.13                 | 8.10            | 0.040    | 0.957    |
| <i>H2-K1</i>   | histocompatibility 2, K1, K<br>region                                 | 2.03                 | 10.24           | 0.039    | 0.957    |
| <i>Ino80</i>   | INO80 homolog                                                         | 2.01                 | 6.40            | 0.032    | 0.957    |
| <i>Chd7</i>    | chromodomain helicase DNA<br>binding protein 7                        | 1.98                 | 7.76            | 0.037    | 0.957    |
| <i>Ccr2</i>    | chemokine (C-C motif) receptor<br>2                                   | 1.98                 | 2.62            | 0.035    | 0.957    |
| <i>Slc44a5</i> | solute carrier family 44, member<br>5                                 | 1.94                 | 1.82            | 0.029    | 0.957    |
| <i>Fndc3b</i>  | fibronectin type III domain                                           | 1.92                 | 8.63            | 0.024    | 0.957    |

|                 |                                                                |      |      |       |       |
|-----------------|----------------------------------------------------------------|------|------|-------|-------|
|                 | containing 3B                                                  |      |      |       |       |
| <i>Mast4</i>    | microtubule associated serine/threonine kinase family member 4 | 1.90 | 8.08 | 0.043 | 0.957 |
| <i>Magea6</i>   | melanoma antigen, family A, 6                                  | 1.89 | 2.82 | 0.030 | 0.957 |
| <i>Mir23b</i>   | microRNA 23b                                                   | 1.89 | 7.70 | 0.033 | 0.957 |
| <i>Zbtb20</i>   | zinc finger and BTB domain containing 20                       | 1.89 | 8.28 | 0.013 | 0.957 |
| <i>Tnfrsf1b</i> | tumor necrosis factor receptor superfamily, member 1b          | 1.88 | 5.03 | 0.035 | 0.957 |
| <i>Iqcf3</i>    | IQ motif containing F3                                         | 1.87 | 3.06 | 0.005 | 0.957 |
| <i>Prelp</i>    | proline arginine-rich end leucine-rich repeat                  | 1.87 | 5.57 | 0.010 | 0.957 |
| <i>Tlr7</i>     | toll-like receptor 7                                           | 1.86 | 5.47 | 0.018 | 0.957 |
| <i>Ambra1</i>   | autophagy/beclin 1 regulator 1                                 | 1.86 | 8.23 | 0.046 | 0.957 |
| <i>Rasal1</i>   | RAS protein activator like 1                                   | 1.83 | 7.08 | 0.019 | 0.957 |
| <i>Sin3a</i>    | transcriptional regulator, SIN3A                               | 1.82 | 8.39 | 0.026 | 0.957 |
| <i>Nktr</i>     | natural killer tumor recognition sequence                      | 1.82 | 8.64 | 0.032 | 0.957 |
| <i>Fign</i>     | fidgetin                                                       | 1.82 | 3.60 | 0.014 | 0.957 |
| <i>Rptor</i>    | regulatory associated protein of MTOR, complex 1               | 1.82 | 6.36 | 0.038 | 0.957 |
| <i>Lrif1</i>    | ligand dependent nuclear receptor interacting factor 1         | 1.82 | 5.16 | 0.011 | 0.957 |
| <i>Scaf4</i>    | SR-related CTD-associated factor 4                             | 1.81 | 7.95 | 0.023 | 0.957 |
| <i>Uvrag</i>    | UV radiation resistance associated gene                        | 1.79 | 6.39 | 0.005 | 0.957 |
| <i>Clec4g</i>   | C-type lectin domain family 4, member g                        | 1.78 | 3.94 | 0.030 | 0.957 |
| <i>Pld4</i>     | phospholipase D family, member 4                               | 1.78 | 5.85 | 0.030 | 0.957 |
| <i>Clip4</i>    | CAP-GLY domain containing linker protein family, member 4      | 1.78 | 7.84 | 0.018 | 0.957 |
| <i>Atxn7</i>    | ataxin 7                                                       | 1.76 | 6.72 | 0.020 | 0.957 |
| <i>Gm11042</i>  | predicted gene 11042<br>[Source:MGI<br>Symbol;Acc:MGI:3779266] | 1.76 | 5.23 | 0.025 | 0.957 |

|                 |                                                                                            |      |       |       |       |
|-----------------|--------------------------------------------------------------------------------------------|------|-------|-------|-------|
| <i>Gm10217</i>  | predicted gene 10217<br>[Source:MGI<br>Symbol;Acc:MGI:3642099]                             | 1.75 | 10.50 | 0.032 | 0.957 |
| <i>Dennd1a</i>  | DENN/MADD domain<br>containing 1A                                                          | 1.75 | 6.04  | 0.042 | 0.957 |
| <i>Map3k13</i>  | mitogen-activated protein kinase<br>kinase kinase 13                                       | 1.74 | 5.56  | 0.029 | 0.957 |
| <i>Ghrl</i>     | ghrelin                                                                                    | 1.74 | 5.68  | 0.039 | 0.957 |
| <i>Grn</i>      | granulin                                                                                   | 1.73 | 9.13  | 0.046 | 0.957 |
| <i>Arhgap26</i> | Rho GTPase activating protein 26                                                           | 1.72 | 7.67  | 0.021 | 0.957 |
| <i>Traf3ip3</i> | TRAF3 interacting protein 3                                                                | 1.70 | 4.55  | 0.027 | 0.957 |
| <i>Exoc6b</i>   | exocyst complex component 6B                                                               | 1.70 | 6.55  | 0.005 | 0.957 |
| <i>Kmt2a</i>    | lysine (K)-specific<br>methyltransferase 2A                                                | 1.70 | 7.02  | 0.040 | 0.957 |
| <i>Pomt1</i>    | protein-O-mannosyltransferase 1                                                            | 1.69 | 6.93  | 0.033 | 0.957 |
| <i>Pik3ap1</i>  | phosphoinositide-3-kinase<br>adaptor protein 1                                             | 1.69 | 7.30  | 0.005 | 0.957 |
| <i>Olfir692</i> | olfactory receptor 692                                                                     | 1.69 | 4.06  | 0.040 | 0.957 |
| <i>Atp10a</i>   | ATPase, class V, type 10A                                                                  | 1.68 | 4.58  | 0.024 | 0.957 |
| <i>Clec3a</i>   | C-type lectin domain family 3,<br>member a                                                 | 1.68 | 2.73  | 0.033 | 0.957 |
| <i>Gm17571</i>  | predicted gene, 17571<br>[Source:MGI<br>Symbol;Acc:MGI:4937205]                            | 1.67 | 10.93 | 0.018 | 0.957 |
| <i>Gbp9</i>     | guanylate-binding protein 9                                                                | 1.67 | 3.12  | 0.048 | 0.957 |
| <i>Arhgap39</i> | Rho GTPase activating protein 39                                                           | 1.67 | 6.40  | 0.028 | 0.957 |
| <i>Arhgap15</i> | Rho GTPase activating protein 15                                                           | 1.66 | 3.68  | 0.027 | 0.957 |
| <i>Gm6455</i>   | predicted gene 6455                                                                        | 1.65 | 2.97  | 0.028 | 0.957 |
| <i>Tlr9</i>     | toll-like receptor 9                                                                       | 1.65 | 3.94  | 0.040 | 0.957 |
| <i>Casz1</i>    | castor zinc finger 1                                                                       | 1.65 | 6.81  | 0.005 | 0.957 |
| <i>Zfp248</i>   | zinc finger protein 248                                                                    | 1.65 | 4.61  | 0.035 | 0.957 |
| <i>Galnt9</i>   | UDP-N-acetyl-alpha-D-<br>galactosamine:polypeptide N-<br>acetylgalactosaminyltransferase 9 | 1.64 | 3.89  | 0.019 | 0.957 |
| <i>Strada</i>   | STE20-related kinase adaptor<br>alpha                                                      | 1.64 | 3.79  | 0.048 | 0.957 |
| <i>Zfp280c</i>  | zinc finger protein 280C                                                                   | 1.64 | 6.25  | 0.042 | 0.957 |

|                 |                                                                                  |      |       |       |       |
|-----------------|----------------------------------------------------------------------------------|------|-------|-------|-------|
| <i>Efcab9</i>   | EF-hand calcium binding domain<br>9                                              | 1.64 | 2.93  | 0.014 | 0.957 |
| <i>Ggcx</i>     | gamma-glutamyl carboxylase                                                       | 1.63 | 8.20  | 0.045 | 0.957 |
| <i>Thbs3</i>    | thrombospondin 3                                                                 | 1.62 | 3.75  | 0.035 | 0.957 |
| <i>Clasp1</i>   | CLIP associating protein 1                                                       | 1.62 | 6.72  | 0.025 | 0.957 |
| <i>Zc3h7a</i>   | zinc finger CCCH type<br>containing 7 A                                          | 1.61 | 7.04  | 0.000 | 0.957 |
| <i>Arsb</i>     | arylsulfatase B                                                                  | 1.61 | 7.44  | 0.040 | 0.957 |
| <i>Hdac8</i>    | histone deacetylase 8                                                            | 1.61 | 5.96  | 0.028 | 0.957 |
| <i>Tonsl</i>    | tonsoku-like, DNA repair protein                                                 | 1.60 | 3.97  | 0.049 | 0.957 |
| <i>Hmgxb3</i>   | HMG box domain containing 3                                                      | 1.60 | 6.28  | 0.029 | 0.957 |
| <i>Olf102</i>   | olfactory receptor 102                                                           | 1.59 | 1.90  | 0.016 | 0.957 |
| <i>Gm3414</i>   | predicted gene 3414                                                              | 1.59 | 4.53  | 0.011 | 0.957 |
| <i>Olf1786</i>  | olfactory receptor 786                                                           | 1.58 | 2.44  | 0.033 | 0.957 |
| <i>Cyp2s1</i>   | cytochrome P450, family 2,<br>subfamily s, polypeptide 1                         | 1.58 | 8.64  | 0.045 | 0.957 |
| <i>Dpp7</i>     | dipeptidylpeptidase 7                                                            | 1.58 | 6.51  | 0.043 | 0.957 |
| <i>Med27</i>    | mediator complex subunit 27                                                      | 1.58 | 6.26  | 0.024 | 0.957 |
| <i>Cabyr</i>    | calcium-binding tyrosine-(Y)-<br>phosphorylation regulated<br>(fibrousheathin 2) | 1.57 | 3.11  | 0.025 | 0.957 |
| <i>Secisbp2</i> | SECIS binding protein 2                                                          | 1.57 | 6.06  | 0.010 | 0.957 |
| <i>Cdk17</i>    | cyclin-dependent kinase 17                                                       | 1.57 | 6.28  | 0.000 | 0.957 |
| <i>Wdr7</i>     | WD repeat domain 7                                                               | 1.57 | 6.78  | 0.021 | 0.957 |
| <i>Vwc2</i>     | von Willebrand factor C domain<br>containing 2                                   | 1.57 | 3.74  | 0.027 | 0.957 |
| <i>Scd1</i>     | stearoyl-Coenzyme A desaturase<br>1                                              | 1.57 | 10.09 | 0.008 | 0.957 |
| <i>Gpr153</i>   | G protein-coupled receptor 153                                                   | 1.57 | 3.76  | 0.040 | 0.957 |
| <i>Olf1987</i>  | olfactory receptor 987                                                           | 1.56 | 2.39  | 0.030 | 0.957 |
| <i>Dnajb13</i>  | DnaJ (Hsp40) related, subfamily<br>B, member 13                                  | 1.56 | 3.33  | 0.047 | 0.957 |
| <i>Nvl</i>      | nuclear VCP-like                                                                 | 1.55 | 6.60  | 0.044 | 0.957 |
| <i>Bnc1</i>     | basonuclin 1                                                                     | 1.55 | 4.35  | 0.047 | 0.957 |
| <i>Ndst1</i>    | N-deacetylase/N-sulfotransferase<br>(heparan glucosaminyl) 1                     | 1.54 | 8.83  | 0.003 | 0.957 |

|                      |                                                                     |       |       |       |       |
|----------------------|---------------------------------------------------------------------|-------|-------|-------|-------|
| <i>G530012D18Rik</i> | RIKEN cDNA G530012D1 gene<br>[Source:MGI<br>Symbol;Acc:MGI:3642025] | 1.53  | 3.90  | 0.019 | 0.957 |
| <i>Ces1a</i>         | carboxylesterase 1A                                                 | 1.53  | 3.13  | 0.013 | 0.957 |
| <i>Gm11060</i>       | predicted gene 11060<br>[Source:MGI<br>Symbol;Acc:MGI:3779284]      | 1.53  | 8.03  | 0.014 | 0.957 |
| <i>Cul7</i>          | cullin 7                                                            | 1.52  | 5.55  | 0.040 | 0.957 |
| <i>F2rl2</i>         | coagulation factor II (thrombin)<br>receptor-like 2                 | 1.52  | 4.81  | 0.041 | 0.957 |
| <i>Psg20</i>         | pregnancy-specific glycoprotein<br>20                               | 1.52  | 4.60  | 0.030 | 0.957 |
| <i>Gtpbp8</i>        | GTP-binding protein 8 (putative)                                    | 1.52  | 4.83  | 0.041 | 0.957 |
| <i>Tcf4</i>          | transcription factor 4                                              | 1.52  | 8.43  | 0.014 | 0.957 |
| <i>Znrf3</i>         | zinc and ring finger 3                                              | 1.51  | 7.01  | 0.036 | 0.957 |
| <i>Gm694</i>         | predicted gene 694                                                  | 1.51  | 3.52  | 0.015 | 0.957 |
| <i>Shisa5</i>        | shisa family member 5                                               | 1.50  | 7.09  | 0.049 | 0.957 |
| <i>Gbf1</i>          | golgi-specific brefeldin A-<br>resistance factor 1                  | 1.50  | 9.12  | 0.046 | 0.957 |
| <i>Sohlh2</i>        | spermatogenesis and oogenesis<br>specific basic helix-loop-helix 2  | -1.50 | 2.36  | 0.009 | 0.957 |
| <i>Stub1</i>         | STIP1 homology and U-Box<br>containing protein 1                    | -1.50 | 6.62  | 0.042 | 0.957 |
| <i>Snrpf</i>         | small nuclear ribonucleoprotein<br>polypeptide F                    | -1.51 | 5.37  | 0.006 | 0.957 |
| <i>Mapk1</i>         | mitogen-activated protein kinase<br>1                               | -1.52 | 6.51  | 0.014 | 0.957 |
| <i>1700029H14Rik</i> | RIKEN cDNA 1700029H14 gene                                          | -1.52 | 6.04  | 0.043 | 0.957 |
| <i>Hint1</i>         | histidine triad nucleotide binding<br>protein 1                     | -1.52 | 7.33  | 0.015 | 0.957 |
| <i>Nme2</i>          | NME/NM23 nucleoside<br>diphosphate kinase 2                         | -1.53 | 8.13  | 0.036 | 0.957 |
| <i>Ppp1r11</i>       | protein phosphatase 1, regulatory<br>(inhibitor) subunit 11         | -1.53 | 5.86  | 0.007 | 0.957 |
| <i>Ipp</i>           | IAP promoted placental gene                                         | -1.53 | 3.60  | 0.025 | 0.957 |
| <i>Dcpp3</i>         | demilune cell and parotid protein<br>3                              | -1.53 | 12.55 | 0.038 | 0.957 |
| <i>Ptov1</i>         | prostate tumor over expressed<br>gene 1                             | -1.53 | 7.23  | 0.016 | 0.957 |

|                      |                                                            |       |       |       |       |
|----------------------|------------------------------------------------------------|-------|-------|-------|-------|
| <i>Yif1a</i>         | Yip1 interacting factor homolog A ( <i>S. cerevisiae</i> ) | -1.53 | 5.64  | 0.046 | 0.957 |
| <i>2410015M20Rik</i> | RIKEN cDNA 2410015M20 gene                                 | -1.53 | 6.39  | 0.046 | 0.957 |
| <i>Rps5</i>          | ribosomal protein S5                                       | -1.54 | 7.61  | 0.039 | 0.957 |
| <i>Mpi</i>           | mannose phosphate isomerase                                | -1.54 | 7.17  | 0.024 | 0.957 |
| <i>Nap111</i>        | nucleosome assembly protein 1-like 1                       | -1.54 | 7.39  | 0.005 | 0.957 |
| <i>Dynlt1b</i>       | dynein light chain Tctex-type 1B                           | -1.55 | 6.48  | 0.048 | 0.957 |
| <i>Crygn</i>         | crystallin, gamma N                                        | -1.55 | 5.18  | 0.015 | 0.957 |
| <i>Tbx5</i>          | T-box 5                                                    | -1.55 | 3.85  | 0.034 | 0.957 |
| <i>Cmc2</i>          | COX assembly mitochondrial protein 2                       | -1.55 | 5.19  | 0.040 | 0.957 |
| <i>Angptl4</i>       | angiopoietin-like 4                                        | -1.56 | 4.94  | 0.041 | 0.957 |
| <i>Olf1377</i>       | olfactory receptor 1377                                    | -1.56 | 3.29  | 0.020 | 0.957 |
| <i>Nt5c</i>          | 5,3-nucleotidase, cytosolic                                | -1.56 | 5.44  | 0.028 | 0.957 |
| <i>Nsmce4a</i>       | non-SMC element 4 homolog A ( <i>S. cerevisiae</i> )       | -1.56 | 5.54  | 0.045 | 0.957 |
| <i>Znhit6</i>        | zinc finger, HIT type 6                                    | -1.56 | 5.26  | 0.024 | 0.957 |
| <i>Dhrs4</i>         | dehydrogenase/reductase (SDR family) member 4              | -1.57 | 7.33  | 0.038 | 0.957 |
| <i>Rfx4</i>          | regulatory factor X, 4                                     | -1.57 | 3.96  | 0.006 | 0.957 |
| <i>B230217C12Rik</i> | RIKEN cDNA B230217C12 gene                                 | -1.57 | 3.94  | 0.002 | 0.957 |
| <i>Prorsd1</i>       | prolyl-tRNA synthetase domain containing 1                 | -1.58 | 5.22  | 0.004 | 0.957 |
| <i>Dynll2</i>        | dynein light chain LC8-type 2                              | -1.58 | 4.82  | 0.026 | 0.957 |
| <i>Tbx2</i>          | T-box 2                                                    | -1.58 | 6.06  | 0.037 | 0.957 |
| <i>Cbx3</i>          | chromobox 3                                                | -1.58 | 8.12  | 0.026 | 0.957 |
| <i>Sat2</i>          | spermidine/spermine N1-acetyl transferase 2                | -1.59 | 4.18  | 0.009 | 0.957 |
| <i>Rps20</i>         | ribosomal protein S20                                      | -1.59 | 7.11  | 0.042 | 0.957 |
| <i>Snx1</i>          | sorting nexin 1                                            | -1.59 | 4.98  | 0.019 | 0.957 |
| <i>Eif3i</i>         | eukaryotic translation initiation factor 3, subunit I      | -1.59 | 6.22  | 0.036 | 0.957 |
| <i>Dcpp2</i>         | demilune cell and parotid protein 2                        | -1.59 | 12.10 | 0.043 | 0.957 |
| <i>Rpl19</i>         | ribosomal protein L19                                      | -1.59 | 8.65  | 0.033 | 0.957 |

|                |                                                                                 |       |      |       |       |
|----------------|---------------------------------------------------------------------------------|-------|------|-------|-------|
| <i>Tlx1</i>    | T cell leukemia, homeobox 1                                                     | -1.59 | 6.56 | 0.012 | 0.957 |
| <i>Atp5f1</i>  | ATP synthase, H <sup>+</sup> transporting, mitochondrial F0 complex, subunit B1 | -1.60 | 7.58 | 0.008 | 0.957 |
| <i>St3gal5</i> | ST3 beta-galactoside alpha-2,3-sialyltransferase 5                              | -1.60 | 5.64 | 0.033 | 0.957 |
| <i>Adrb3</i>   | adrenergic receptor, beta 3                                                     | -1.60 | 4.03 | 0.019 | 0.957 |
| <i>Igbp1</i>   | immunoglobulin (CD79A) binding protein 1                                        | -1.60 | 6.85 | 0.046 | 0.957 |
| <i>Hsd12</i>   | hydroxysteroid dehydrogenase like 2                                             | -1.61 | 5.01 | 0.006 | 0.957 |
| <i>Gm19659</i> | PREDICTED: predicted gene, 19659 (Gm19659), mRNA.                               | -1.61 | 1.94 | 0.038 | 0.957 |
| <i>Cklf</i>    | chemokine-like factor                                                           | -1.61 | 4.35 | 0.033 | 0.957 |
| <i>Ppip5k2</i> | diphosphoinositol pentakisphosphate kinase 2                                    | -1.61 | 5.64 | 0.029 | 0.957 |
| <i>Lipm</i>    | lipase, family member M                                                         | -1.62 | 2.31 | 0.004 | 0.957 |
| <i>Gnb2l1</i>  | guanine nucleotide binding protein (G protein), beta polypeptide 2 like 1       | -1.63 | 8.08 | 0.033 | 0.957 |
| <i>Mrpl22</i>  | mitochondrial ribosomal protein L22                                             | -1.64 | 3.66 | 0.016 | 0.957 |
| <i>Il1r2</i>   | interleukin 1 receptor, type II                                                 | -1.64 | 4.28 | 0.030 | 0.957 |
| <i>Adck3</i>   | aarF domain containing kinase 3                                                 | -1.64 | 5.95 | 0.041 | 0.957 |
| <i>Bcl2a1d</i> | B cell leukemia/lymphoma 2 related protein A1d                                  | -1.64 | 3.55 | 0.049 | 0.957 |
| <i>Fgf13</i>   | fibroblast growth factor 13                                                     | -1.65 | 2.66 | 0.040 | 0.957 |
| <i>Rps26</i>   | ribosomal protein S26                                                           | -1.65 | 7.57 | 0.005 | 0.957 |
| <i>Aldh7a1</i> | aldehyde dehydrogenase family 7, member A1                                      | -1.65 | 8.15 | 0.041 | 0.957 |
| <i>Gm20736</i> | predicted gene, 20736                                                           | -1.65 | 1.85 | 0.031 | 0.957 |
| <i>Gucy1a3</i> | guanylate cyclase 1, soluble, alpha 3                                           | -1.65 | 3.07 | 0.028 | 0.957 |
| <i>Hspa2</i>   | heat shock protein 2                                                            | -1.65 | 3.76 | 0.039 | 0.957 |
| <i>Serp1</i>   | stress-associated endoplasmic reticulum protein 1                               | -1.66 | 9.53 | 0.039 | 0.957 |
| <i>Glr3</i>    | glutaredoxin 3                                                                  | -1.66 | 6.66 | 0.047 | 0.957 |
| <i>Suclg1</i>  | succinate-CoA ligase, GDP-                                                      | -1.66 | 7.37 | 0.036 | 0.957 |



|                  |                                                                                           |       |      |       |       |
|------------------|-------------------------------------------------------------------------------------------|-------|------|-------|-------|
|                  | forming, alpha subunit                                                                    |       |      |       |       |
| <i>Veph1</i>     | ventricular zone expressed PH domain-containing 1                                         | -1.66 | 3.21 | 0.028 | 0.957 |
| <i>Arl1</i>      | ADP-ribosylation factor-like 1                                                            | -1.66 | 8.99 | 0.017 | 0.957 |
| <i>Neu2</i>      | neuraminidase 2                                                                           | -1.67 | 5.79 | 0.032 | 0.957 |
| <i>Aven</i>      | apoptosis, caspase activation inhibitor                                                   | -1.67 | 5.80 | 0.015 | 0.957 |
| <i>Tcf19</i>     | transcription factor 19                                                                   | -1.67 | 4.16 | 0.002 | 0.957 |
| <i>Rpsa</i>      | ribosomal protein SA                                                                      | -1.67 | 8.56 | 0.014 | 0.957 |
| <i>Mtif3</i>     | mitochondrial translational initiation factor 3                                           | -1.67 | 4.60 | 0.032 | 0.957 |
| <i>Dynlt1c</i>   | dynein light chain Tctex-type 1C                                                          | -1.68 | 5.79 | 0.023 | 0.957 |
| <i>Fam174a</i>   | family with sequence similarity 174, member A                                             | -1.68 | 5.97 | 0.005 | 0.957 |
| <i>BC031181</i>  | cDNA sequence BC031181                                                                    | -1.69 | 6.58 | 0.021 | 0.957 |
| <i>Tmem42</i>    | transmembrane protein 42                                                                  | -1.70 | 4.98 | 0.012 | 0.957 |
| <i>Hist1h2ac</i> | histone cluster 1, H2ac                                                                   | -1.70 | 5.74 | 0.012 | 0.957 |
| <i>Pfdn1</i>     | prefoldin 1                                                                               | -1.72 | 5.68 | 0.009 | 0.957 |
| <i>Rps9</i>      | ribosomal protein S9                                                                      | -1.73 | 7.48 | 0.015 | 0.957 |
| <i>Ywhaq</i>     | tyrosine 3-monooxygenase/tryptophan 5-monooxygenase activation protein, theta polypeptide | -1.73 | 7.40 | 0.037 | 0.957 |
| <i>Vdac1</i>     | voltage-dependent anion channel 1                                                         | -1.73 | 7.44 | 0.042 | 0.957 |
| <i>Adprh</i>     | ADP-ribosylarginine hydrolase                                                             | -1.75 | 4.68 | 0.033 | 0.957 |
| <i>Clql4</i>     | complement component 1, q subcomponent-like 4                                             | -1.76 | 2.69 | 0.040 | 0.957 |
| <i>Hibadh</i>    | 3-hydroxyisobutyrate dehydrogenase                                                        | -1.77 | 7.53 | 0.041 | 0.957 |
| <i>Hsbp1l1</i>   | heat shock factor binding protein 1-like 1                                                | -1.77 | 4.95 | 0.046 | 0.957 |
| <i>Dpm3</i>      | dolichyl-phosphate mannosyltransferase polypeptide 3                                      | -1.78 | 6.83 | 0.032 | 0.957 |
| <i>Ndufa9</i>    | NADH dehydrogenase (ubiquinone) 1 alpha subcomplex, 9                                     | -1.78 | 6.95 | 0.009 | 0.957 |

|                |                                                             |       |      |       |       |
|----------------|-------------------------------------------------------------|-------|------|-------|-------|
| <i>Fbxw9</i>   | F-box and WD-40 domain protein 9                            | -1.78 | 4.85 | 0.016 | 0.957 |
| <i>Ntan1</i>   | N-terminal Asn amidase                                      | -1.80 | 5.51 | 0.004 | 0.957 |
| <i>Rps4x</i>   | ribosomal protein S4, X-linked                              | -1.80 | 7.37 | 0.038 | 0.957 |
| <i>Abhd3</i>   | abhydrolase domain containing 3                             | -1.81 | 4.61 | 0.011 | 0.957 |
| <i>Tnnc2</i>   | troponin C2, fast                                           | -1.83 | 4.59 | 0.036 | 0.957 |
| <i>Blvra</i>   | biliverdin reductase A                                      | -1.83 | 5.22 | 0.015 | 0.957 |
| <i>Ccl28</i>   | chemokine (C-C motif) ligand 28                             | -1.83 | 9.24 | 0.039 | 0.957 |
| <i>Hint2</i>   | histidine triad nucleotide binding protein 2                | -1.85 | 4.40 | 0.040 | 0.957 |
| <i>Ube2a</i>   | ubiquitin-conjugating enzyme E2A                            | -1.85 | 4.68 | 0.014 | 0.957 |
| <i>Cnpy4</i>   | canopy 4 homolog (zebrafish)                                | -1.87 | 4.01 | 0.020 | 0.957 |
| <i>Anapc4</i>  | anaphase promoting complex subunit 4                        | -1.87 | 4.56 | 0.045 | 0.957 |
| <i>Adgrg3</i>  | adhesion G protein-coupled receptor G3                      | -1.87 | 3.62 | 0.044 | 0.957 |
| <i>Moap1</i>   | modulator of apoptosis 1)                                   | -1.88 | 3.58 | 0.001 | 0.957 |
| <i>Ndufa6</i>  | NADH dehydrogenase (ubiquinone) 1 alpha subcomplex, 6 (B14) | -1.96 | 6.20 | 0.023 | 0.957 |
| <i>Tpt1</i>    | tumor protein, translationally-controlled 1                 | -1.98 | 9.19 | 0.014 | 0.957 |
| <i>Acp1</i>    | acid phosphatase 1, soluble                                 | -1.98 | 5.49 | 0.030 | 0.957 |
| <i>Anxa2</i>   | annexin A2                                                  | -1.99 | 5.43 | 0.038 | 0.957 |
| <i>Etfa</i>    | electron transferring flavoprotein, alpha polypeptide       | -1.99 | 7.52 | 0.045 | 0.957 |
| <i>Gnmt</i>    | glycine N-methyltransferase                                 | -2.00 | 6.57 | 0.019 | 0.957 |
| <i>Insig1</i>  | insulin induced gene 1                                      | -2.21 | 8.25 | 0.028 | 0.957 |
| <i>Rpl36al</i> | ribosomal protein L36A-like                                 | -2.63 | 6.50 | 0.044 | 0.957 |

---

**Supplementary Table 3. The summary of sequencing characteristics**

|                                                                   | Number of raw reads | Number of valid reads | Average read length | Coverage %   |
|-------------------------------------------------------------------|---------------------|-----------------------|---------------------|--------------|
| 24 week old<br><i>Nfkbiz</i> <sup>+/+</sup> (n=5)                 | 76,586 ± 10,119     | 63,527 ± 8,614        | 426 ± 1.5           | 99.97 ± 0.01 |
| 24 week old<br><i>Nfkbiz</i> <sup>-/-</sup> (n=5)                 | 88,757 ± 14,443     | 72,844 ± 12,437       | 425 ± 1.1           | 99.97 ± 0.01 |
| 3 week old<br>non-cohoused<br><i>Nfkbiz</i> <sup>+/+</sup> (n=6)  | 40,673 ± 15,750     | 37,962 ± 15,032       | 425 ± 2.2           | 99.94 ± 0.05 |
| 3 week old<br>cohoused<br><i>Nfkbiz</i> <sup>+/+</sup> (n=6)      | 67,115 ± 18,277     | 52,360 ± 18,837       | 425 ± 1.5           | 99.91 ± 0.09 |
| 3 week old<br>cohoused<br><i>Nfkbiz</i> <sup>-/-</sup> (n=6)      | 75,172 ± 25,495     | 65,805 ± 21,319       | 425 ± 0.8           | 99.93 ± 0.07 |
| 3 week old<br>non-cohoused<br><i>Nfkbiz</i> <sup>-/-</sup> (n=6)  | 77,651 ± 31,487     | 67,109 ± 22,892       | 426 ± 0.4           | 99.96 ± 0.01 |
| 20 week old<br>non-cohoused<br><i>Nfkbiz</i> <sup>+/+</sup> (n=6) | 47,015 ± 13,615     | 43,618 ± 12,109       | 426 ± 0.5           | 99.93 ± 0.01 |
| 20 week old<br>cohoused<br><i>Nfkbiz</i> <sup>+/+</sup> (n=6)     | 54,692 ± 43,660     | 43,526 ± 25,561       | 426 ± 1.0           | 99.89 ± 0.08 |
| 20 week old<br>cohoused<br><i>Nfkbiz</i> <sup>-/-</sup> (n=6)     | 48,650 ± 21,020     | 44,026 ± 19,188       | 426 ± 0.6           | 99.93 ± 0.05 |
| 20 week old<br>non-cohoused<br><i>Nfkbiz</i> <sup>-/-</sup> (n=6) | 51,059 ± 30,985     | 44,182 ± 26,252       | 426 ± 0.9           | 99.93 ± 0.05 |

|               |     |                                                               |     |
|---------------|-----|---------------------------------------------------------------|-----|
| NR_117375.1   | 315 | AGGGAATCTTCGGCAATGGGGCAACCCTGACCGAGCAACGCCGCGTGAGTGAAGAAGGT   | 374 |
| Current study | 1   | .....                                                         | 60  |
| NR_117375.1   | 375 | TTTCGGATCGTAAAGCTCTGTTGTAAGAGAAGAACGTGTGTGAGAGTGGAAGTTCACAC   | 434 |
| Current study | 61  | .....                                                         | 120 |
| NR_117375.1   | 435 | AGTGACGGTAACTTACCAGAAAGGGACGGCTAACTACGTGCCAGCAGCCGCGGTAATACG  | 494 |
| Current study | 121 | .....                                                         | 180 |
| NR_117375.1   | 495 | TAGGTCCCGAGCGTTATCCGGATTTATTGGGCGTAAAGCGAGCGCAGGCCGTTGGATAAG  | 554 |
| Current study | 181 | .....                                                         | 240 |
| NR_117375.1   | 555 | TCTGAAGTTAAAGGCTGTGGCTCAACCATAGTATGCTTTGGAACTGTTCAACTTGAGTG   | 614 |
| Current study | 241 | ..... <b>T</b> .....                                          | 300 |
| NR_117375.1   | 615 | CAGAAGGGGAGAGTGGAATTCATGTGTAGCGGTGGAATGCGTAGATATATGGAGGAACA   | 674 |
| Current study | 301 | .....                                                         | 360 |
| NR_117375.1   | 675 | CCGGTGGCGAAAGCGGCTCTCTGGTCTGTAACGTGACGCTGAGGCTCGAAAGCGTGGGTAG | 734 |
| Current study | 361 | .....                                                         | 420 |
| NR_117375.1   | 735 | CGAAC                                                         | 739 |
| Current study | 421 | .....                                                         | 425 |

**Supplementary Figure 1. The sequence of 16S rRNA gene of *Streptococcus danieliae*** The sequence of a dominant amplified sequence variant assigned to *S. danieliae* in the current study was compared to the sequence of 16S rRNA gene of *S. danieliae* strain ERD01G reported by Clavel et al.<sup>21</sup>
